# Supplementary material
Source: publisher site journal article supplement (https://www.spandidos-publications.com/734/downloadSupplementary)

Figure S1. Population distributions of patients before and after PSM. (A) Treatment with PMRT before PSM; (B) treatment with no PMRT before PSM; (C) treatment with PMRT after PSM; and (D) treatment with no PMRT after PSM. PMRT, post-mastectomy radiotherapy; PSM, propensity score matching.

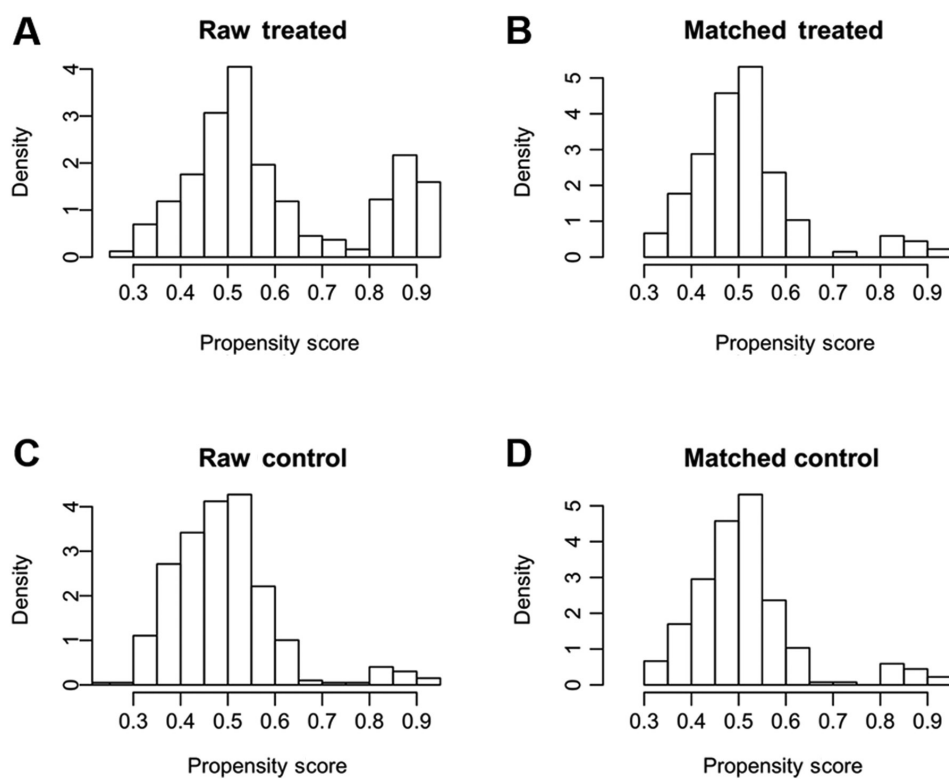

Supplement: Supplementary file 1 [file downloadSupplementary]
